# Supplementary material for: Left Ventricular End-Diastolic Pressure and B-Type Natriuretic Peptide Levels Guidance of Low-Dose Furosemide Treatment to Prevent Contrast-Induced Nephropathy in Patients with Percutaneous Coronary Intervention: A Randomized Controlled Trial
Source: Hindawi journal article supplement (doi:10.1155/2021/6526270), 2021-11-05
Supplement: f1 [file 6526270.f1.zip]

Archive with 2 entries (2 files):
- 6526270.f1/CONSORT Checklist.doc
- 6526270.f1/Supplementary Tables.docx
