# Supplementary material for: Left Ventricular End-Diastolic Pressure and B-Type Natriuretic Peptide Levels Guidance of Low-Dose Furosemide Treatment to Prevent Contrast-Induced Nephropathy in Patients with Percutaneous Coronary Intervention: A Randomized Controlled Trial
Source: Hindawi journal article supplement (doi:10.1155/2021/6526270), 2021-11-05
Supplement: f1 [file 6526270.f1.zip › 6526270.f1/Supplementary Tables.docx]

**Supplementary materials**

**Supplementary Table S1**. Comparison of renal function between the two groups

| Renal function indicators | Group | Pre-PCI | Post-PCI | P*-*value  (within groups) | P*-*value  (between groups) |
| --- | --- | --- | --- | --- | --- |
| SCr (umol/L) | Control | 69.45 (17.33) | 71.50 (20.0) | 0.003 | 0.009 |
| Experimental | 69.30 (18.80) | 69.20 (18.8) | 0.927 |
| CCr (mL/min) | Control | 100.05 (35.79) | 95.87 (35.1) | 0.002 | 0.013 |
| Experimental | 101.09 (32.58) | 101.43 (31.2) | 0.827 |
| GFR (mL/min/1.73 m2) | Control | 100.94 (28.19) | 98.12 (26.9) | 0.002 | 0.016 |
| Experimental | 101.22 (26.69) | 102.16 (26.9) | 0.880 |

CCr, creatinine clearance rate; GFR, glomerular filtration rate; PCI, percutaneous coronary intervention; SCr, serum creatinine level. Control group patients received intravenous furosemide injection (20 mg). Experimental group patients received furosemide if they showed left ventricular end-diastolic pressure (LVEDP) ≥15 mmHg, a post-PCI B-type natriuretic peptide (BNP) level ≥100 pg/mL, and/or a post-PCI BNP value of >150% of the pre-PCI value.

**Supplementary Table S2**. Logistic regression analysis

|  | B | SE | Wald | Sig | 95.0% CI for EXP (B) | |
| --- | --- | --- | --- | --- | --- | --- |
| Lower | Upper |
| LVEDP | 0.037 | 0.016 | 5.405 | 0.02 | 1.006 | 1.07 |
| BNP | 1 | 0 | 5.324 | 0.021 | 1 | 1.002 |
| Female | 0.63 | 0.309 | 4.14 | 0.042 | 1.023 | 3.442 |
| Ejection fraction | -0.024 | 0.013 | 3.054 | 0.081 | 0.951 | 1.003 |

BNP, B-type natriuretic peptide; EXP, experimental group; CI, confidence interval; LVEDP, left ventricular end-diastolic pressure; SE, standard error. Experimental group patients received furosemide if they showed LVEDP ≥15 mmHg, a post-PCI BNP level ≥100 pg/mL, and/or a post-PCI BNP value of >50% of the pre-PCI value.
